# Supplementary material for: Morphology and Anatomy of Branch–Branch Junctions in Opuntia ficus-indica and Cylindropuntia bigelovii: A Comparative Study Supported by Mechanical Tissue Quantification
Source: MDPI journal article supplement (doi:10.3390/plants10112313), 2021-10-27
Supplement: s1 [file s1]

# Detailed MRI scanning parameters

## *Opuntia Junctions*

*Mylo et al., 21021 - Plants*

| Species                          | <i>Opuntia ficus-indica</i>  | <i>Opuntia ficus-indica</i>  | <i>Cylindropuntia bigelovii</i> | <i>Cylindropuntia bigelovii</i> |
|----------------------------------|------------------------------|------------------------------|---------------------------------|---------------------------------|
| Scanner                          | Bruker Biospec 94/20         | Bruker Biospec 94/20         | Bruker Biospec 94/20            | Bruker Biospec 94/20            |
| Coil                             | Tx/Rx quadrature volume coil | Tx/Rx quadrature volume coil | Tx/Rx quadrature volume coil    | Tx/Rx quadrature volume coil    |
| Receive only surface coil        | no                           | yes                          | no                              | yes                             |
| Sequence                         | 3D Flash                     | 3D Flash                     | 3D Flash                        | 3D Flash                        |
| Repetition time [ms]             | 30                           | 24                           | 30                              | 24                              |
| Echo time [ms]                   | 3.9                          | 3.5                          | 3.9                             | 3.8                             |
| Alpha [°]                        | 30                           | 20                           | 30                              | 35                              |
| Averages                         | 2                            | 8                            | 4                               | 8                               |
| Duration                         | 2h34min                      | 13h33min                     | 12h18min                        | 13h33min                        |
| Matrix                           | 800 x 400 x 320              | 600 x 420 x 420              | 920 x 600 x 512                 | 800 x 400 x 320                 |
| Field of View [mm <sup>3</sup> ] | 80 x 60 x 51.2               | 40 x 28 x 28                 | 90 x 60 x 51.2                  | 48 x 28 x 28                    |
| Resolution [μm <sup>3</sup> ]    | 100 x 150 x 160              | 67 x 67 x 67                 | 100 x 100 x 100                 | 67 x 67 x 67                    |
| AA                               | 1 1.2 1                      | 1 1.2 1.2                    | 1 1.2 1                         | 1 1.2 1.2                       |
